# Supplementary material for: Reliable cryo-EM resolution estimation with modified Fourier shell correlation
Source: PubMed Central journal article supplement (PMC7642792; doi:10.1107/s2052252520011574), 2020-09-15
Supplement: m-07-00995-sup1.pdf [file m-07-00995-sup1.pdf]

# IUCrJ

**Volume 7 (2020)**

**Supporting information for article:**

**Reliable cryo-EM resolution estimation with modified Fourier shell correlation**

**Pawel A. Penczek**

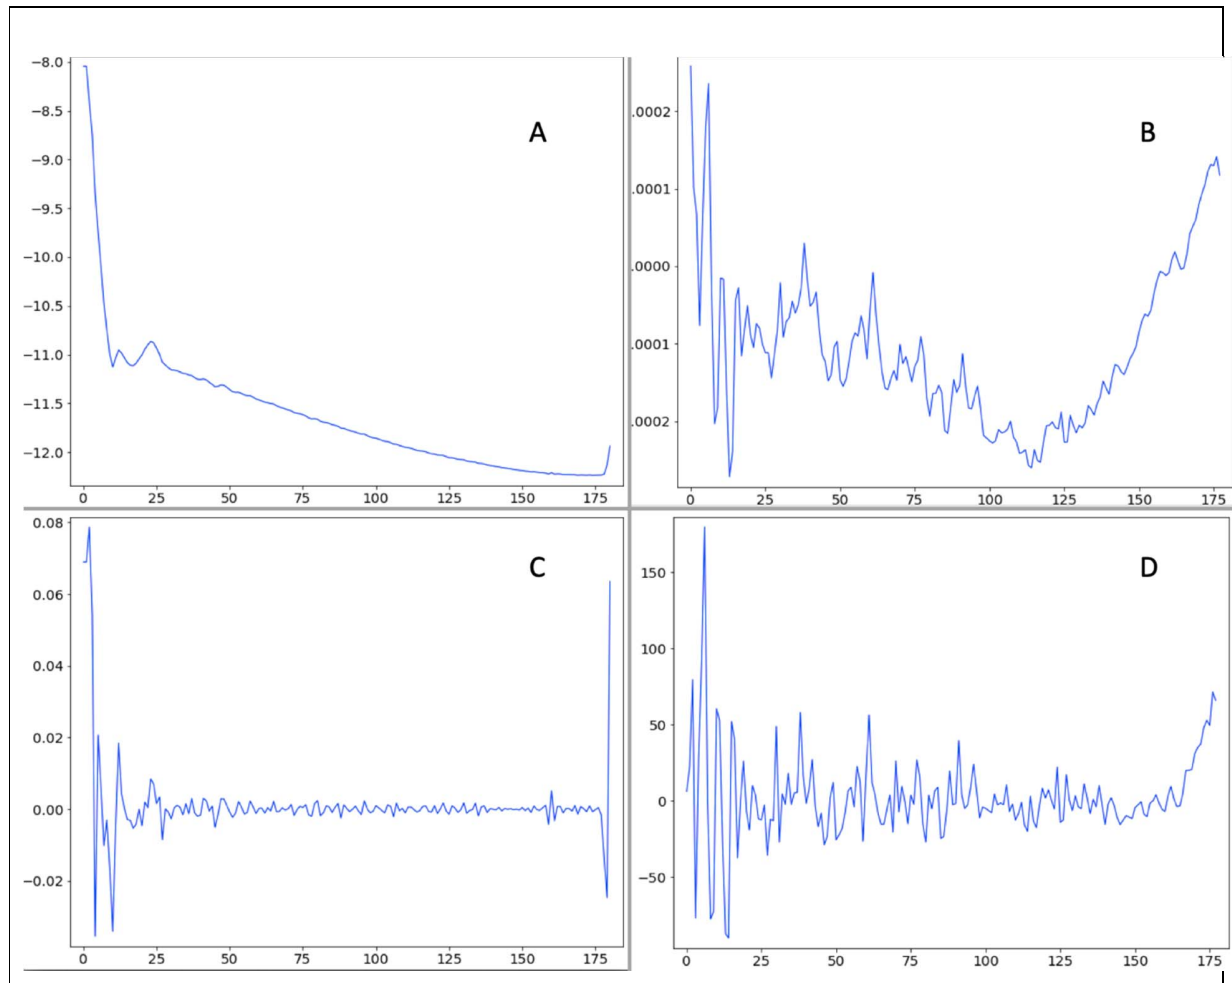

**Figure S1** Prewhitening of noise in 3D map of 80S ribosome. Estimate of noise was obtained by subtracting half-maps from each other  $e = u - v$  (Eq.9). (A) Logarithm of rotationally averaged power spectrum of  $e$ . (B) Rotational average of voxels values of  $e$ . (C) Logarithm of rotationally averaged power spectrum of prewhitened  $e$ . Artifacts at the beginning and end of the plot are due to: (left) small number of samples close to the origin and (right) edge effects. (D) Rotational average of voxels values after prewhitening. X-axis – distance in pixels from the volume center. Y-axis – intensities in arbitrary units.

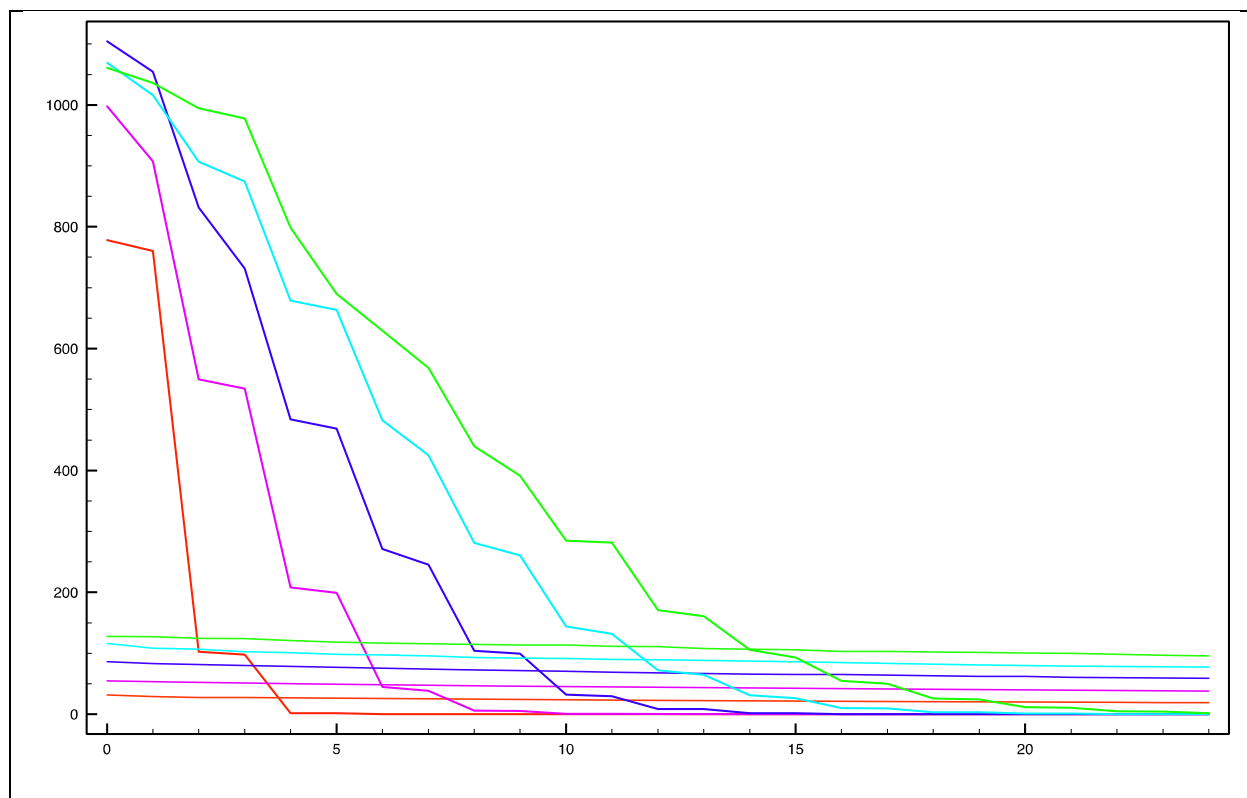

**Figure S2** Determination of effective number of degrees of freedom of a random series of 128 samples multiplied by a Gaussian window function using Monte Carlo simulations. X-axis – eigenvalue number. Y-axis – eigenvalue amplitude. Falling lines – eigenvalues of Gaussian-multiplied noise realizations. Horizontal lines – eigenvalues of shuffled data.  $\sigma_g$  is set to: red 1, magenta 2, dark blue 3, light blue 4, green 5 pixels.
